# Supplementary material
Source: Springer Nature journal article supplement (https://www.springermedizin.de/resource/supplementary/12931_2010_1065_MOESM5_ESM.pdf/9425556)

**A) BUD/FORM maintenance and reliever therapy vs. higher maintenance dose ICS + SABA**

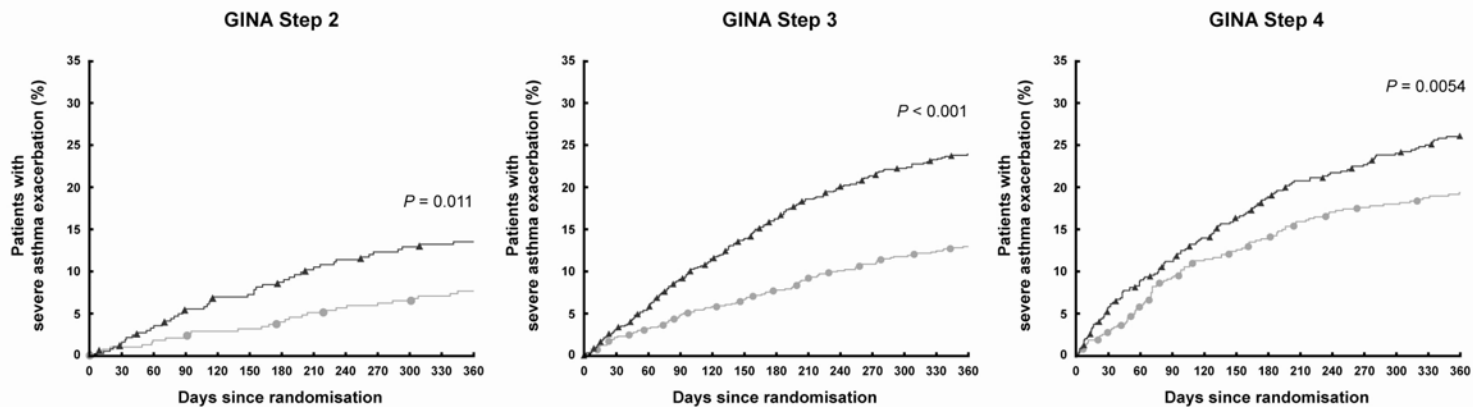

**B) BUD/FORM maintenance and reliever therapy vs. same maintenance dose ICS/LABA + SABA**

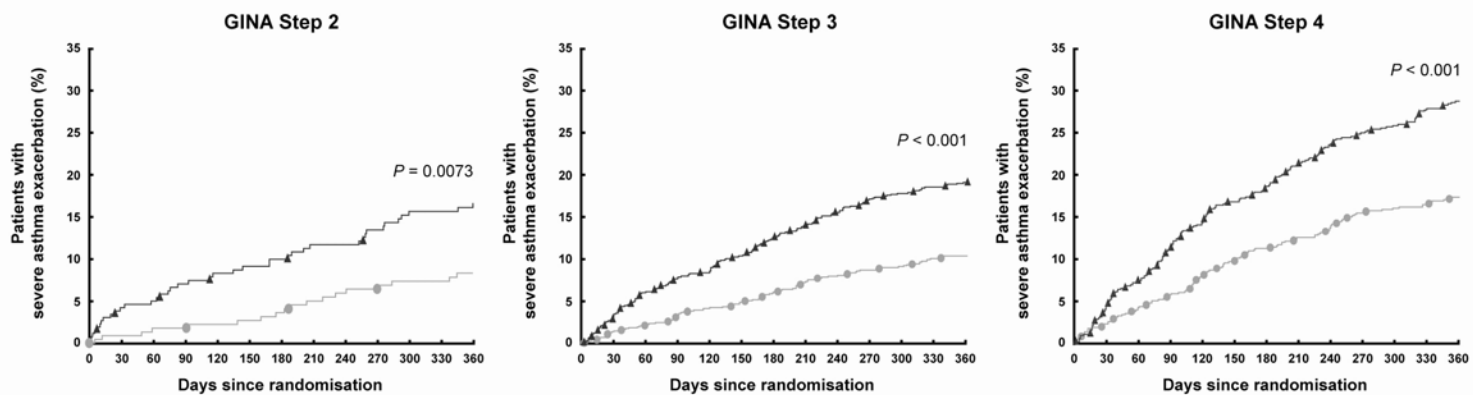

**C) BUD/FORM maintenance and reliever therapy vs. higher maintenance dose ICS/LABA + SABA**

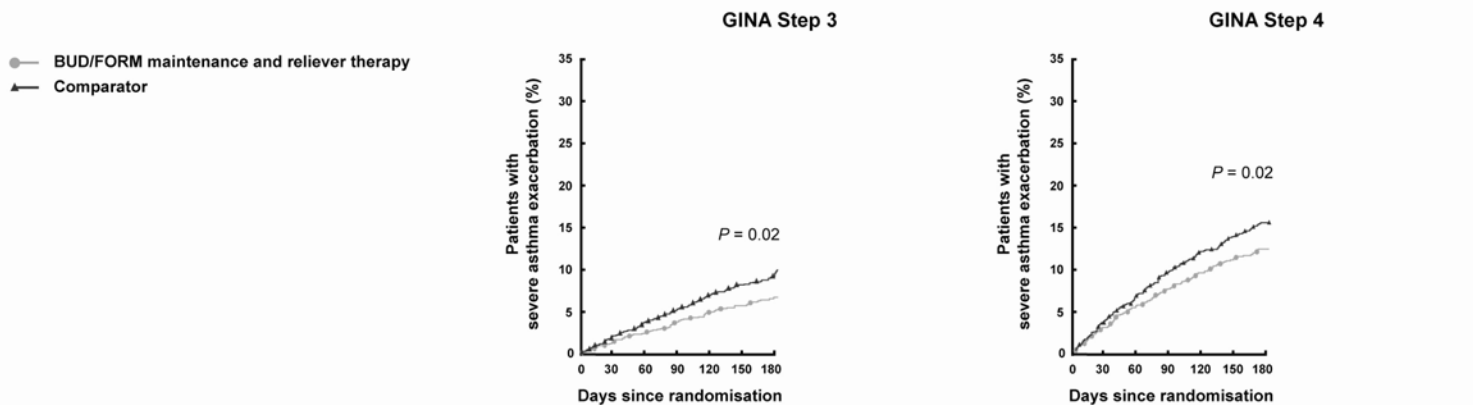

Supplement: MOESM5 [file 9425556]
